# Supplementary material for: Hypomethylation-Mediated Upregulation of PHOX1 Promotes Gastric Cancer Progression through Transcriptional Upregulation of NGFR
Source: Research Square preprint supplement (doi:10.21203/rs.3.rs-6571586/v1), 2025-05-20
Supplement: Supplementary file 2 [file df112fc4aa0bfa582a85ac66.docx]

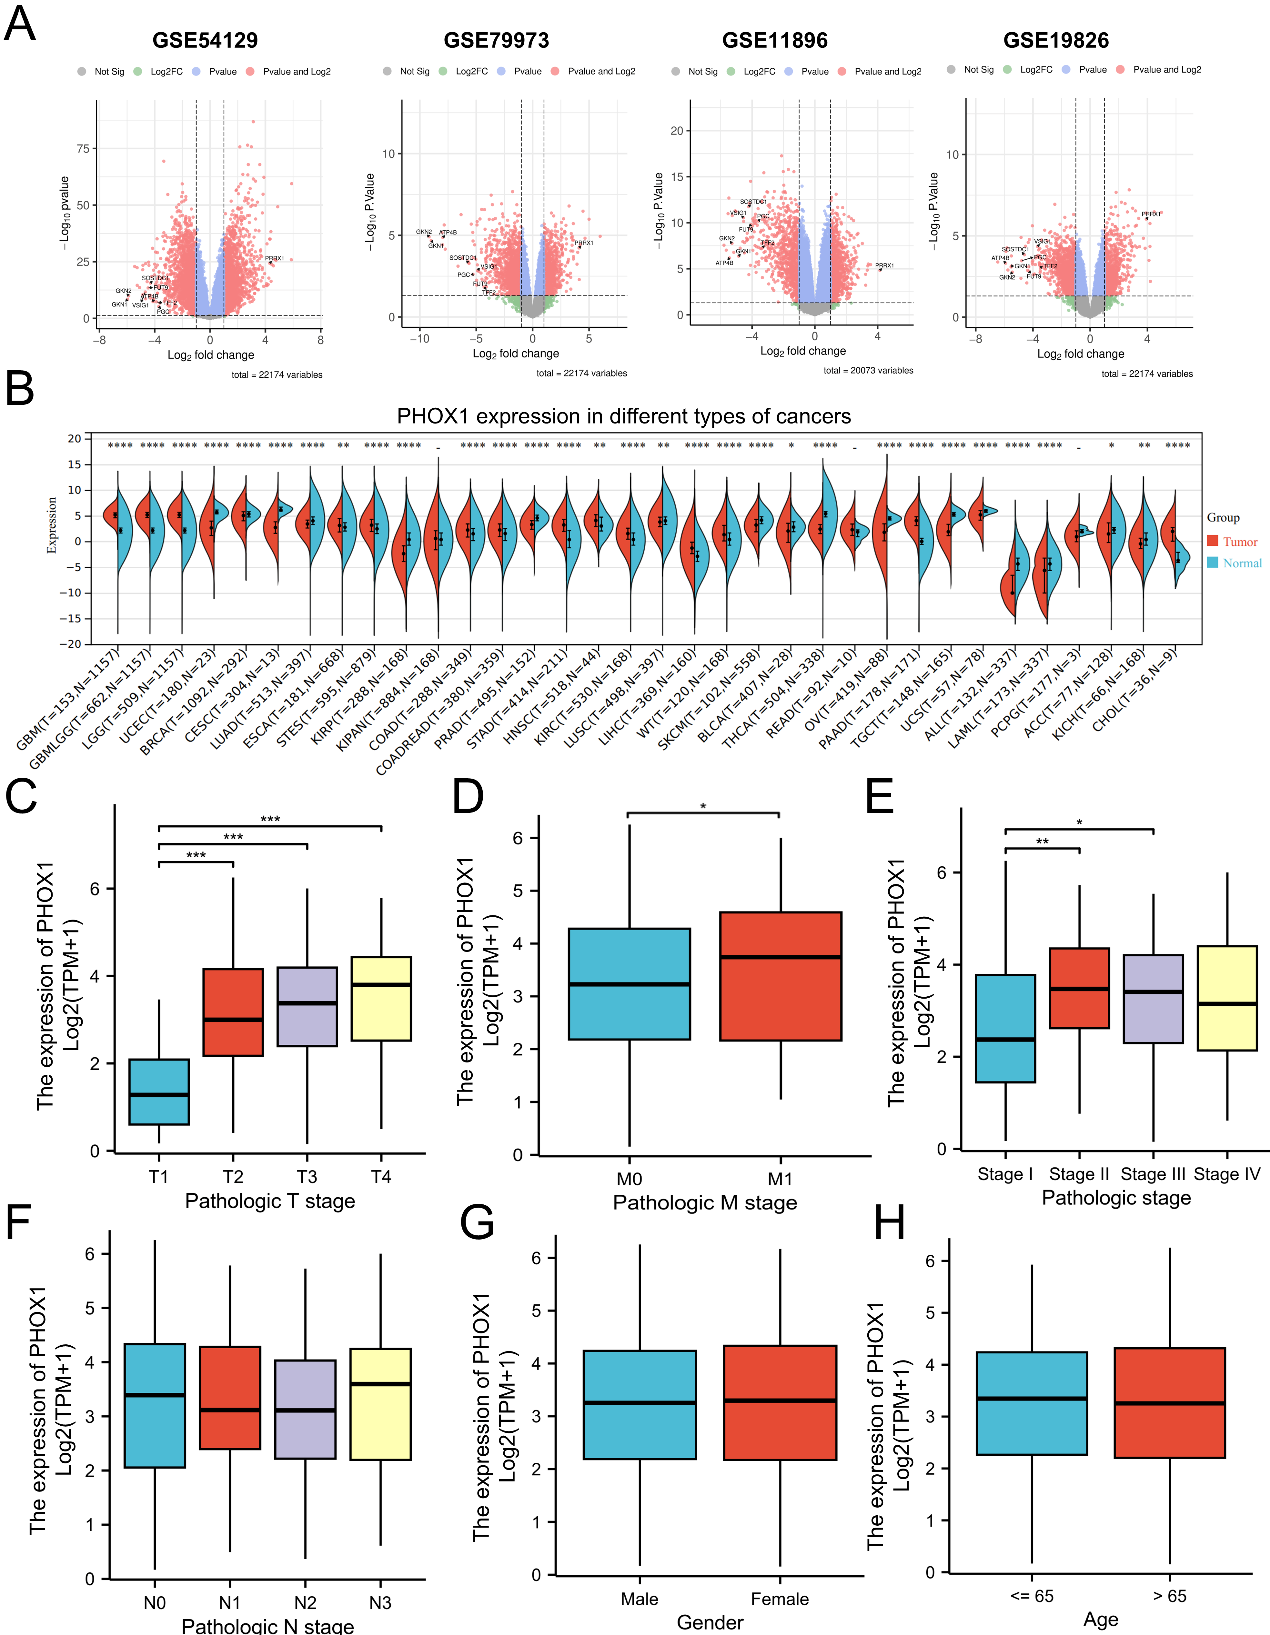


**Fig S1. PHOX1 overexpression is correlated with clinical GC metastasis.**

**A.** Volcano plots represent all DEGs of the respective datasets. The red dot represents genes of |LogFC|≥1 and *P* value < 0.05, and the gray dot represents unchanged genes. **B.** The expression of PHOX1 in 34 different types of cancer from TCGA and GTEx cohorts was analyzed using the SangerBox website. **C.** Bar plot illustrates the expression of PHOX1 across different pathologic T stages in TCGA_STAD dataset. **D.** The expression of PHOX1 in different pathologic M stages (M0 and M1) in TCGA_STAD dataset. **E.** The expression of PHOX1 across different pathologic stages (Stage I, Stage II, Stage III, Stage IV) in TCGA_STAD dataset. **F.** The expression of PHOX1 across different pathologic N stages (N0, N1, N2, N3). **G.** the expression of PHOX1 in different genders (Male and Female). **H.** The expression of PHOX1 in distinct age groups (≤65 and >65). * *P* <0.05, ** *P* <0.01, *** *P* < 0.001, **** *P* <0.0001.


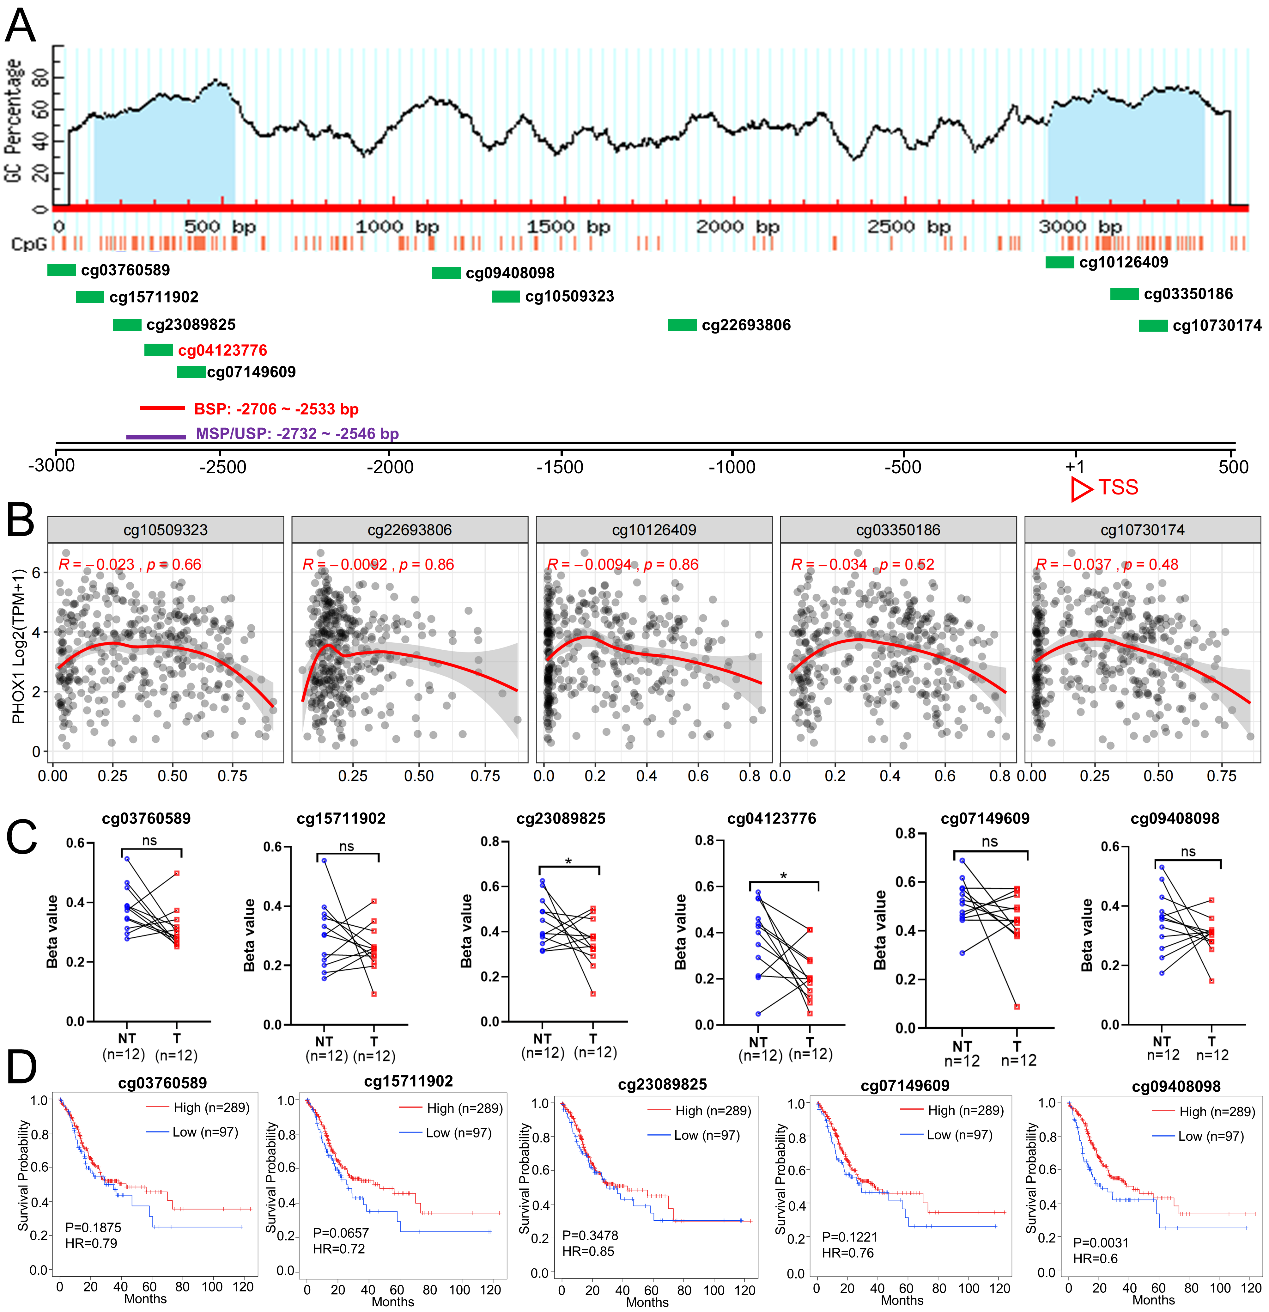


**Fig S2. Promoter hypomethylation of PHOX1 is assosiated with poor pronosis in GC**

**A.** Methylation CpG islands and the primers product length of MSP/BSP distribution in the promoter of PHOX1 were conducted by MethPrimer. Input sequence: red region; CGIs: blue region. **B.** Correlation analysis between PHOX1 and CpG sites was performed by SMART APP. **C.** PHOX1 methylation level of the six significant CpG sites (cg03760589, cg15711902, cg23089825, cg04123776, cg07149609 and cg09408098) in the matched pairs of GC patients from GSE164988 dataset. **D.** The survival analysis of CpG sites in PHOX1 promoter was performed by SMART.


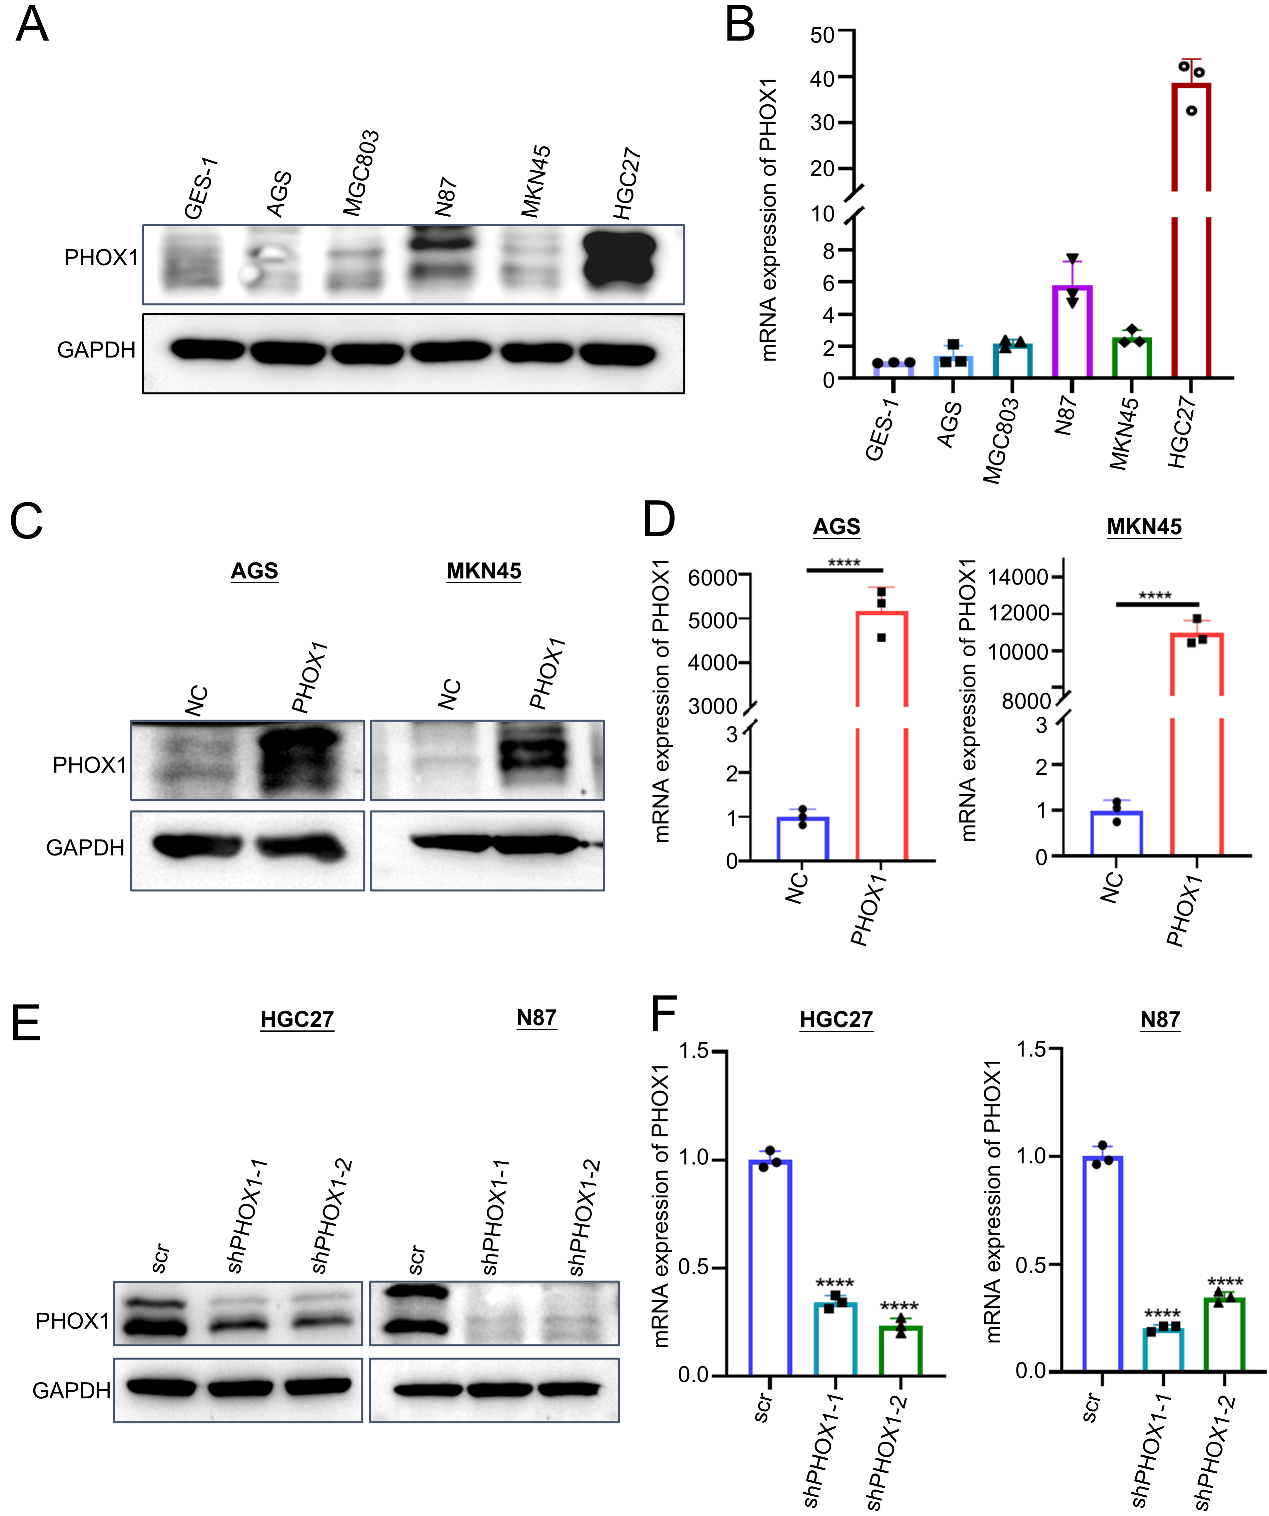


**Fig S3. The construction of stable PHOX1 overexpressing and knockdown GC cells**

**A-B.** Expression of PHOX1 mRNA and protein was detected in GES-1 and five different GC cell lines. Each bar represented the mean ± SD (n ≥ 3). **C-F.** Western blot and RT-qPCR assay were used to verify the successful construction of PHOX1 overexpression and knockdown GC cells.


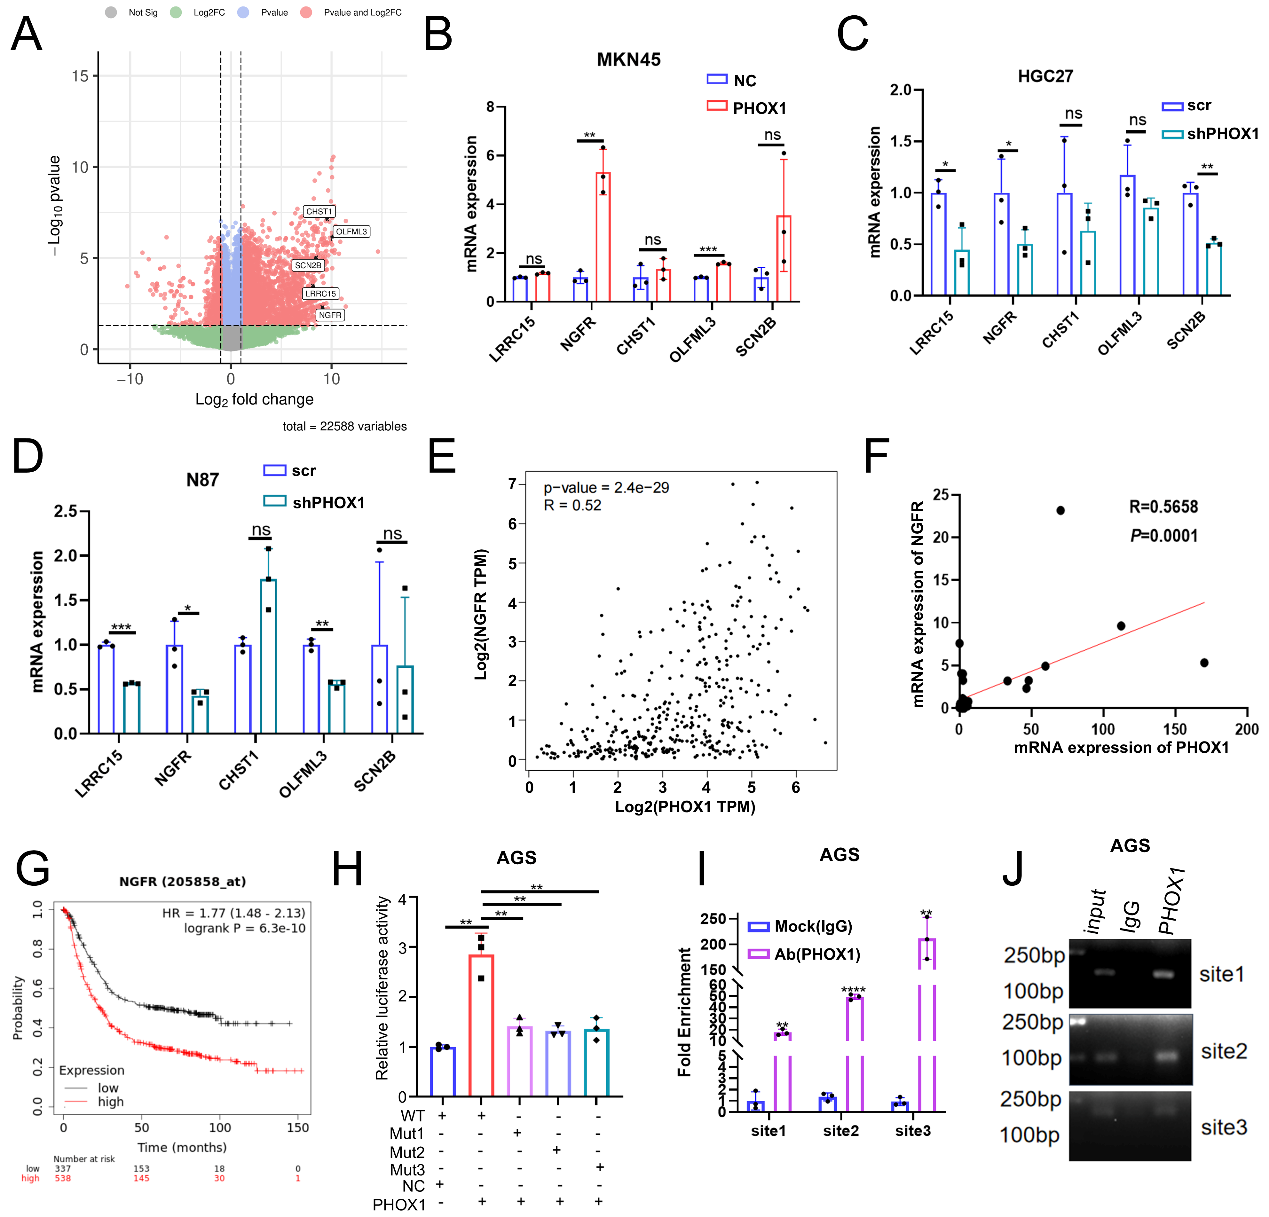


**Fig S4. PHOX1 activates ERK1/2 signaling through NGFR upregulation**

**A.** Volcano plots represent all DEGs of the AGS PHOX1 vs. NC. The red dot represents genes of |LogFC|≥1 and *P* value < 0.05, and the gray dot represents unchanged genes. **B-D.** Effect of PHOX1 on the expression of candidate DEGs detected by RT-qPCR in MKN45, HGC27 and N87. **E.** The correlation between PHOX1 and NGFR in GC tissues were analyzed by the GEPIA2 website. **F.** Correlation between PHOX1 and NGFR in gastric cancer tissues was analyzed by RT-qPCR. n=40, Pearson’s correlation. **G.** The survival analysis of NGFR was performed using the KM plot database. **H.** NGFR promoter luciferase wild type or mutated reporters were co-transfected with PHOX1 and NC, and then luciferase reporter assays were performed. **I-J.** Control and PHOX1-overexpression cells were used for ChIP assay. ChIP-qPCR analysis of PHOX1 enrichment in the NGFR gene promoters in control and PHOX1-overexpression cells (**I**). Amplification of PHOX1-binding sites 1,2 and 3 after ChIP analysis was indicated in the agarose gel. The locations of molecular weight markers accompanied the gel figures (**J**).* *P* <0.05, ** *P* <0.01, *** *P* < 0.001, ns: no significance.
